# Supplementary material for: Compliance of systematic reviews in ophthalmology with the PRISMA statement
Source: Springer Nature journal article supplement (doi:10.1186/s12874-017-0450-1), 2017-12-01
Supplement: MOESM1 [file 15334102]

## Appendix 1. Search strategy for MEDLINE

Database: Ovid MEDLINE(R) <1946 to June Week 5 2017>

Search Strategy:

-----

- 1 Meta-Analysis as Topic/ (16173)
- 2 meta analy\$.tw. (94606)
- 3 metaanaly\$.tw. (1630)
- 4 Meta-Analysis/ (82414)
- 5 (systematic adj (review\$1 or overview\$1)).tw. (82356)
- 6 exp Review Literature as Topic/ (9592)
- 7 or/1-6 (175190)
- 8 cochrane.ab. (45210)
- 9 embase.ab. (46576)
- 10 (psychlit or psyclit).ab. (899)
- 11 (psychinfo or psycinfo).ab. (12040)
- 12 (cinahl or cinhal).ab. (15086)
- 13 science citation index.ab. (2394)
- 14 bids.ab. (393)
- 15 cancerlit.ab. (629)
- 16 or/8-15 (72903)
- 17 reference list\$.ab. (12571)
- 18 bibliograph\$.ab. (13350)
- 19 hand-search\$.ab. (4755)
- 20 relevant journals.ab. (896)
- 21 manual search\$.ab. (2946)
- 22 or/17-21 (30971)
- 23 selection criteria.ab. (23960)
- 24 data extraction.ab. (12994)
- 25 23 or 24 (35054)
- 26 Review/ (2220914)
- 27 25 and 26 (25241)
- 28 Comment/ (659756)
- 29 Letter/ (933659)
- 30 Editorial/ (409271)
- 31 animal/ (6164834)
- 32 human/ (17014592)
- 33 31 not (31 and 32) (4403138)
- 34 or/28-30,33 (5829957)
- 35 7 or 16 or 22 or 27 (208758)
- 36 35 not 34 (196596)
- 37 progress in retinal & eye research.jn. (559)
- 38 ophthalmology.jn. (14401)
- 39 "archives of ophthalmology".jn. (17359)
- 40 "american journal of ophthalmology".jn. (24966)
- 41 "survey of ophthalmology".jn. (2588)
- 42 37 or 38 or 39 or 40 or 41 (59873)
- 43 limit 42 to yr="2010 - 2015" (6834)
- 44 36 and 43 (131)

## Appendix 2. Search strategy for EMBASE

Database: Embase <1996 to 2017 Week 28>

Search Strategy:

-----

- 1 exp Meta Analysis/ (126000)
- 2 ((meta adj analy\$) or metaanalys\$.tw. (146415)
- 3 (systematic adj (review\$1 or overview\$1)).tw. (128280)
- 4 or/1-3 (254153)
- 5 cancerlit.ab. (685)
- 6 cochrane.ab. (68344)
- 7 embase.ab. (70475)
- 8 (psychlit or psyclit).ab. (954)
- 9 (psychinfo or psycinfo).ab. (16595)
- 10 (cinahl or cinhal).ab. (20805)
- 11 science citation index.ab. (2911)
- 12 bids.ab. (470)
- 13 or/5-12 (109176)
- 14 reference lists.ab. (14843)
- 15 bibliograph\$.ab. (15974)
- 16 hand-search\$.ab. (6433)
- 17 manual search\$.ab. (3904)
- 18 relevant journals.ab. (1148)
- 19 or/14-18 (37844)
- 20 data extraction.ab. (17257)
- 21 selection criteria.ab. (27013)
- 22 20 or 21 (42559)
- 23 review.pt. (1828036)
- 24 22 and 23 (20465)
- 25 letter.pt. (686641)
- 26 editorial.pt. (450176)
- 27 animal/ (778374)
- 28 human/ (13197255)
- 29 27 not (27 and 28) (551090)
- 30 or/25-26,29 (1680104)
- 31 4 or 13 or 19 or 24 (298788)
- 32 31 not 30 (290619)
- 33 "progress in retinal and eye research".jn. (671)
- 34 ophthalmology.jn. (10918)
- 35 "archives of ophthalmology".jn. (6182)
- 36 "american journal of ophthalmology".jn. (9457)
- 37 "survey of ophthalmology".jn. (1549)
- 38 33 or 34 or 35 or 36 or 37 (28777)
- 39 limit 38 to yr="2010 - 2015" (7133)
- 40 32 and 39 (122)
